# Supplementary figures and images for: Low plasma progranulin levels in children with autism
Source: Springer Nature journal article supplement (doi:10.1186/1742-2094-8-111), 2011-01-01

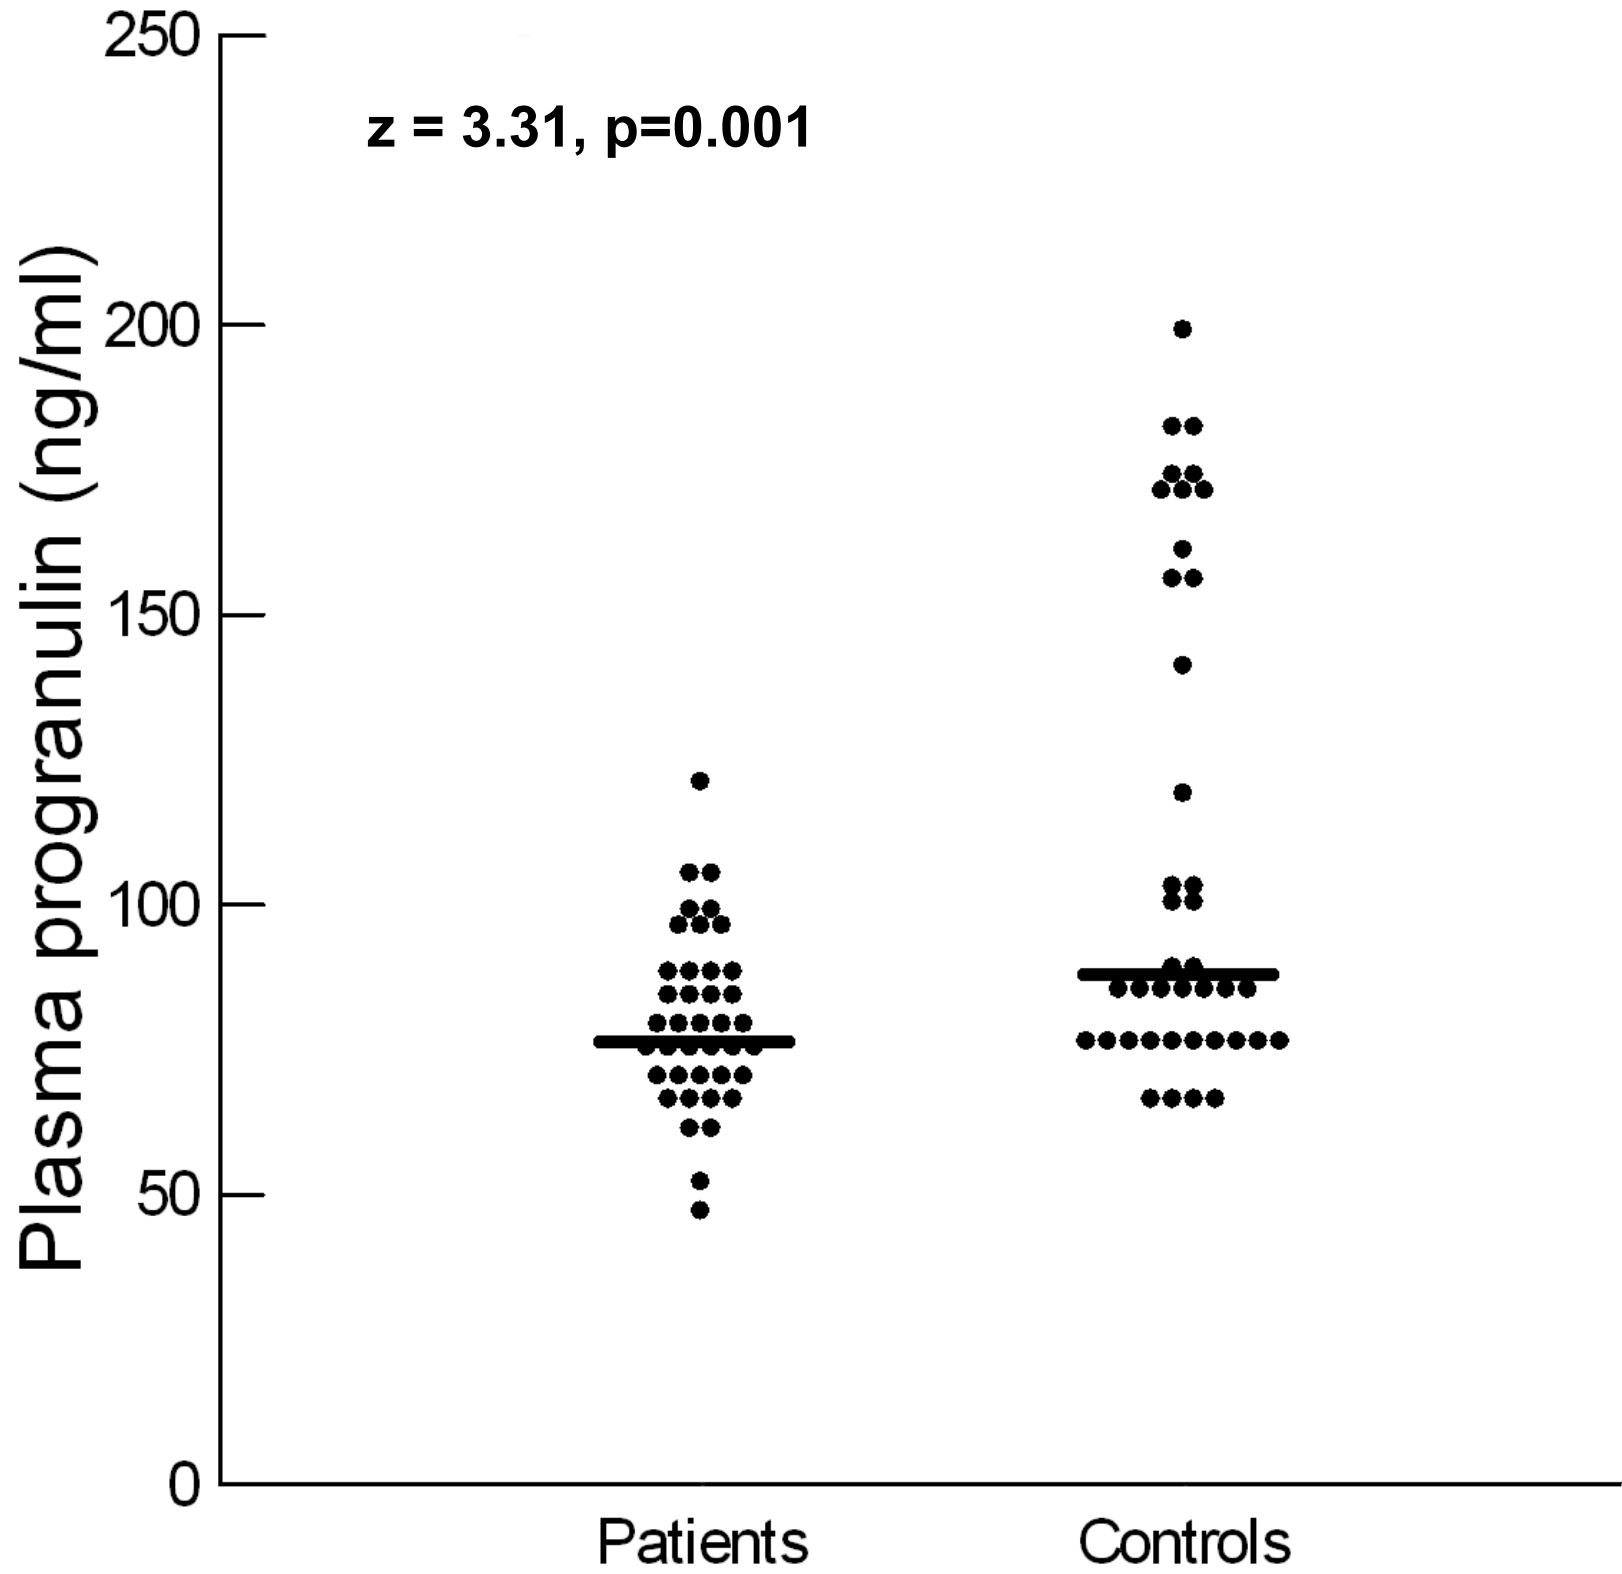

Supplement: 12974_2011_423_MOESM1_ESM.pdf [file 12974_2011_423_MOESM1_ESM.pdf]
